# Supplementary material
Source: Research Square preprint supplement (doi:10.21203/rs.3.rs-9043447/v1)
Supplement: Supplementary file 1 [file dd390c9d3847eb934f73e74a.xlsx]

## Sheet: Sheet1
Code	Group & Site	Normal vs. SCA	Age (y.o)	Sex	SARA	Time from onset (years)	# CAG repeats	Latency N140 (ms)	N140 Resp. vs. No Resp.	N140 Lat. Normal vs. abnormal iif(¨v9>166¨, ¨1¨ , ¨2¨);	Amplitude N140 (uv)	Latency N20 (ms)	N20 Resp vs. No resp	N20 Lat. Normal vs. abnormal	Amplitude N20 (uv)
CED	CO-Hav	Control	34	M				100	R	N	42
EAP	CO-Hav	Control	33	M				132	R	N	63
LGB	CO-Hav	Control	21	F				126	R	N	30
BEP	CO-Hav	Control	44	F				137	R	N	37
ARM	CO-Hav	Control	30	M				127	R	N	6
FDF	CO-Hav	Control	22	M				140	R	N	39
JEA	CO-Hav	Control	30	M				121	R	N	22
DLV	CO-Hav	Control	56	F				140	R	N	29	18	R	N	8
ARC	CO-Hav	Control	26	F				124	R	N	25	18	R	N	4
CABL	CO-Hav	Control	54	M				154	R	N	13	22	R	A	2
DGC	CO-Hav	Control	33	M				122	R	N	37	16	R	N	3
JAGG	CO-Hav	Control	37	F				137	R	N	32	20	R	N	2
LEFR	CO-Hav	Control	34	F				131	R	N	26	17	R	N	3
MFL	CO-Hav	Control	34	F				139	R	N	16	18	R	N	2
JVH	CO-Hav	Control	30	M				129	R	N	17	20	R	N	2
RMQ	CO-Hav	Control	33	M				124	R	N	11				1
AAR	CO-Hav	Control	35	F				119	R	N	12	17	R	N	2
EJEG	CO-Hav	Control	27	M				137	R	N	5	19	R	N	5
MEFH	CO-Hav	Control	31	M				115	R	N	9	20	R	N	3
DSC	CO-Hol	Control	44	F				136	R	N	19
JCR	CO-Hol	Control	54	M				178	R	A	9
LR	CO-Hol	Control	30	F				132	R	N	15
ARM	CO-Hol	Control	39	M				138	R	N	26
YI	CO-Hol	Control	40	F				131	R	N	33
IRB	CO-Hol	Control	68	F				160	R	N	14
DAG	CO-Hol	Control	48	M				151	R	N	37
RTV	CO-Hol	Control	39	M				142	R	N	20
YGG	CO-Hol	Control	30	M				132	R	N	14
JRA	CO-Hol	Control	40	M				131	R	N	14
TSC	CO-Hol	Control	53	F				148	R	N	11
APM	CO-Hol	Control	23	F				135	R	N	15
VPP	CO-Hol	Control	58	M				145	R	N	7
EM	CO-Hol	Control	57	M				142	R	N	19
PPH	CO-Hol	Control	57	M				169	R	A	10
EJBS	SCA2-Hav	SCA2	51	M				139	R	N	26	21	R	N	3
APM	SCA2-Hav	SCA2	45	M	16	19	43		NR	N		22	R	A	1
ZGR	SCA2-Hav	SCA2	64	F	9	7	35	188	R	A	18	20	R	A	3
PMHM	SCA2-Hav	SCA2	52	M				124	R	N	36	23	R	A	1
DCHR	SCA2-Hav	SCA2	31	M									NR
JBH	SCA2-Hav	SCA2	60	M	10	18	38						NR
JSC	SCA2-Hav	SCA2	51	M	11	18				N			NR
YRR	SCA2-Hav	SCA2	51	F	14	12	39	191	R	A	51	22	R	A	1
ICM	SCA2-Hav	SCA2	51	F	12	13	35	183	R	A	26	24	R	A	1
IPO	SCA2-Hav	SCA2	53	F	12	18	39	153	R	N	9	21	R	N	1
YDN	SCA2-Hav	SCA2	43	M	14	20	39	174	R	A	20	22	R	A	1
RSR	SCA2-Hav	SCA2	38	M	14	16	45	178	R	A	10	22	R	A	0
LLTS	SCA2-Hav	SCA2	58	F				159	R	N	24		NR
RTA	SCA2-Hav	SCA2	60	M				147	R	N	16	20	R	N	3
YBB	SCA2-Hav	SCA2	46	F	9	16	41	167	R	A	10		NR		2
GMC	SCA2-Hav	SCA2	43	F		11		149	R	N	6	20	R	N	1
VAN	SCA2-Hol	SCA2	61	F	13		38	180	R	A	30
GPA	SCA2-Hol	SCA2	76	F				188	R	A	16
IMR	SCA2-Hol	SCA2	55	M	15	19	39	161	R	N	12
AGB	SCA2-Hol	SCA2	74	M	10			148	R	N	7
JPA	SCA2-Hol	SCA2	63	M	12	12	41	176	R	A	15
GVA	SCA2-Hol	SCA2	72	M	11			171	R	A	17
GPC	SCA2-Hol	SCA2	36	M	7			143	R	N	26
LRM	SCA2-Hol	SCA2	49	F	14			172	R	A	21
YAP	SCA2-Hol	SCA2	44	F	16	15	37	184	R	A	14
AGA	SCA2-Hol	SCA2	27	M	8			155	R	N	23
RPR	SCA2-Hol	SCA2	62	F	12	16	37	182	R	A	74
RAM	SCA2-Hol	SCA2	46	M	13	12	39	190	R	A	12
